# Supplementary material for: Liquid Chromatography–High-Resolution Mass Spectrometry (LC-HRMS) Profiling of Commercial Enocianina and Evaluation of Their Antioxidant and Anti-Inflammatory Activity
Source: MDPI journal article supplement (doi:10.3390/antiox11061187), 2022-06-16
Supplement: s1 [file s1]

**Table S1.** Compounds identified by LC-ESI-MS in positive and negative ion modes are ordered on the basis of the retention time. Compounds shown in the TIC recorded in negative ion mode (lower panel of Figure 1) are in italic.

| Peak | Compound name                                   | RT   | [M-H] <sup>-</sup> <sub>exp</sub> | Δ ppm  | MS/MS                 | [M+H] <sup>+</sup> <sub>exp</sub> | Δ ppm | MS/MS                       |
|------|-------------------------------------------------|------|-----------------------------------|--------|-----------------------|-----------------------------------|-------|-----------------------------|
| 1    | Gallic acid                                     | 1.9  | 169.01400                         | 1.775  | 123 - 125 - 169       |                                   |       |                             |
| 2    | Galloyl glucose                                 | 2.1  | 331.06653                         | 0.030  | 169 - 191 - 241 - 271 |                                   |       |                             |
| 3    | Hexoside of protocatechuic acid                 | 2.4  | 315.07181                         | 0.666  | 153                   |                                   |       |                             |
| 4    | Gallocatechin                                   | 2.5  | 305.06628                         | 0.524  | 125 - 179 - 219 - 261 |                                   |       |                             |
| 5    | Protocatechuic acid                             | 3.2  | 153.01910                         | 2.091  | 109 - 123 - 153       |                                   |       |                             |
| 6    | Caftaric acid                                   | 3.5  | 311.03958                         | -0.675 | 149 - 179             |                                   |       |                             |
| 7    | Epigallocatechin                                | 3.8  | 305.06628                         | 0.524  | 125 - 179 - 219 - 261 |                                   |       |                             |
| 8    | Caffeoyl glucoside 1                            | 3.9  | 341.0878                          | 1.612  | 179                   |                                   |       |                             |
| 9    | Delphinidin 3-O-glucoside                       | 4    |                                   |        |                       | 465.10240                         | 1.914 | 303                         |
| 10   | Procyanidin B peak1                             | 4.1  | 577.13452                         | -0.121 | 289-407-425           | 579.14910                         | 1.951 | 291 - 409 - 427             |
| 11   | Procyanidin B peak2                             | 4.4  | 577.13452                         | -0.121 | 289-407               |                                   |       |                             |
| 12   | Caffeoyl glucoside 2                            | 4.6  | 341.0878                          | 1.612  | 179                   |                                   |       |                             |
| 13   | Coutaric acid                                   | 5.4  | 295.04544                         | 0.169  | 149 - 163             |                                   |       |                             |
| 14   | Cyanidin 3-O-glucoside                          | 5.4  |                                   |        |                       | 449.10773                         | 1.447 | 287                         |
| 15   | Procyanidin trimer peak 1                       | 5.4  |                                   |        |                       | 867.21252                         | 1.268 | 577-579                     |
| 16   | Catechin                                        | 5.6  | 289.07144                         | 0.795  | 125 - 245             | 291.08661                         | 0.824 | 123 - 139 - 147 - 151 - 165 |
| 17   | Procyanidin trimer peak 2                       | 5.9  |                                   |        |                       | 867.21332                         | 0.345 | 577-579                     |
| 18   | Procyanidin B peak3                             | 6.1  | 577.13434                         | -0.433 | 289-407-425           |                                   |       |                             |
| 19   | Petunidin 3-O-glucoside                         | 6.4  |                                   |        |                       | 479.11800                         | 1.962 | 317                         |
| 20   | <i>p</i> -coumaroyl-glucose 1                   | 6.7  | 325.09241                         | 0.215  | 163                   | 327.10751                         | 1.436 | 309                         |
| 21   | Procyanidin B peak4                             | 7.1  | 577.13434                         | -0.433 | 289-407-425           | 579.14940                         | 1.433 | 291 - 409 - 427             |
| 22   | Fertaric acid                                   | 7.4  | 325.05646                         | 1.568  | 193                   | 327.07114                         | 1.375 | 133 - 196 - 177 - 309       |
| 23   | <i>p</i> -coumaroyl-glucose 2                   | 8.3  | 325.09241                         | 0.215  | 163 - 235 - 265       | 327.10757                         | 1.253 | 147 - 309                   |
| 24   | Epicatechin                                     | 8.7  | 289.07159                         | 1.314  | 109 - 125 - 245       | 291.08643                         | 1.442 | 123 - 139 - 151 - 165 - 273 |
| 25   | Peonidin 3-O-glucoside                          | 9    |                                   |        |                       | 463.12320                         | 1.792 | 301                         |
| 26   | Malvidin 3-O-glucoside                          | 9.8  |                                   |        |                       | 493.13360                         | 2.008 | 331                         |
| 27   | Procyanidin trimer peak 3                       | 11   |                                   |        |                       | 867.21210                         | 1.752 | 577-579                     |
| 28   | Ethyl gallate                                   | 11.7 | 197.04530                         | 1.522  | 125 - 151 - 153 - 169 |                                   |       |                             |
| 29   | Petunidin 3-O-glucoside-acetaldehyde            | 11.9 |                                   |        |                       | 503.11771                         | 1.371 | 341                         |
| 30   | Procyanidin tetramer                            | 13   |                                   |        |                       | 1155.2761                         | 0.770 | -                           |
| 31   | Delphinidin 3-O-glucoside-8-ethyl-(epi)catechin | 13.2 |                                   |        |                       | 781.19702                         | 1.228 | 329-491-619                 |

|    |                                                       |      |           |        |           |           |        |                 |
|----|-------------------------------------------------------|------|-----------|--------|-----------|-----------|--------|-----------------|
| 32 | Delphinidin 3-O-(6''-acetyl)-glucoside                | 14   |           |        |           | 507.11290 | 1.893  | 303             |
| 33 | Myricetin 3-glucuronide                               | 14.2 | 493.0618  | -0.060 | 317       | 495.07650 | 1.959  | 319             |
| 34 | Peonidin 3-O-glucoside-pyruvate                       | 14.2 |           |        |           | 531.11279 | 0.997  | 369             |
| 35 | Myricetin 3-O-glucoside                               | 14.8 | 479.08295 | 0.814  | 317       | 481.09730 | 1.871  | 319             |
| 36 | Myricetin dihexoside                                  | 16.1 |           |        |           | 643.14996 | 1.648  | 319 - 481       |
| 37 | Vitisin A                                             | 16.2 |           |        |           | 561.12330 | 1.996  | 399             |
| 38 | Malvidin 3-O-glucoside-pyruvate                       | 16.3 |           |        |           | 561.12317 | 1.265  | 399             |
| 39 | Piceid                                                | 18.2 | 389.1239  | 0.668  | 227       | 391.13861 | 1.712  | 229             |
| 40 | Vitisin B                                             | 18.5 |           |        |           | 517.13370 | 1.713  | 355             |
| 41 | Malvidin 3-O-glucoside-acetaldehyde                   | 18.9 |           |        |           | 517.13348 | 1.102  | 355             |
| 42 | Cyanidin 3-O-acetylglucoside                          | 19.1 |           |        |           | 491.11832 | 1.262  | 287             |
| 43 | Catechin gallate/epicatechin gallate                  | 19.2 | 441.08234 | 0.385  | 289       | 443.09705 | 1.715  | 153 - 273 - 291 |
| 44 | Malvidin 3-O-(6''-acetyl)-glucoside-pyruvate          | 20.6 |           |        |           | 603.13403 | 0.696  | 399             |
| 45 | Petunidin 3-O-(6''-acetyl)-glucoside                  | 20.7 |           |        |           | 521.12848 | 1.976  | 317             |
| 46 | Quercetin 3-O-galactoside                             | 20.9 | 463.08786 | 0.453  | 301       | 465.10245 | 1.806  | 303             |
| 47 | Quercetin 3-O-glucuronide                             | 21.6 | 477.06769 | 1.634  | 301       | 479.08176 | 1.649  | 303             |
| 48 | Quercetin 3-O-glucoside                               | 22.4 | 463.08795 | 0.647  | 301       | 465.10242 | 1.871  | 303             |
| 49 | Dihydroquercetin 3-O-rhamnoside                       | 22.6 |           |        |           | 451.12317 | 1.884  | 305 - 415 - 433 |
| 50 | Malvidin 3-O-glucoside-8-ethyl-(epi)catechin isomer 1 | 23.7 |           |        |           | 809.22827 | 0.580  | 357-519-647     |
| 51 | Laricitrin 3-O-glucoside / Laricitrin 3-O-galactoside | 23.8 | 493.0986  | 0.790  | 331       | 495.1146  | -1.514 | 333             |
| 52 | Peonidin 3-O-glucoside-8-ethyl-(epi)catechin isomer 1 | 24.2 |           |        |           | 779.2179  | 1.039  | 327-489-617     |
| 53 | Malvidin 3-O-glucoside-acetone                        | 24.9 |           |        |           | 531.14923 | 0.884  | 369             |
| 54 | Malvidin 3-O-(6''-acetyl)-glucoside-acetaldehyde      | 25.1 |           |        |           | 559.1441  | 0.929  | 355             |
| 55 | Malvidin 3-O-glucoside-8-ethyl-(epi)catechin isomer 2 | 25.9 |           |        |           | 809.22852 | 0.271  | 357-519-647     |
| 56 | Peonidin 3-O-(6''-acetyl)-glucoside                   | 26   |           |        |           | 505.13361 | 1.940  | 301             |
| 57 | Peonidin 3-O-glucoside-8-ethyl-(epi)catechin isomer 2 | 26.6 |           |        |           | 779.21777 | 1.206  | 327-489-617     |
| 58 | Kaempferol 3-O-galactoside                            | 26.6 | 447.09286 | 0.290  | 285       | 449.10761 | 1.692  | 287             |
| 59 | Malvidin 3-O-(6''-acetyl)-glucoside                   | 27.1 |           |        |           | 535.14429 | 1.607  | 331             |
| 60 | Malvidin 3-O-glucosidepyruvate procyanidin dimer 1    | 27.2 |           |        |           | 1093.2596 | 1.573  | 641-803-943     |
| 61 | Malvidin 3-O-glucoside-8-ethyl-(epi)catechin isomer 3 | 27.7 |           |        |           | 809.22809 | 0.803  | 357-519-647     |
| 62 | Petunidin 3-O-(6''-caffeoyl)-glucoside                | 28.5 |           |        |           | 641.14966 | 1.512  | 302 - 317 - 479 |
| 63 | Malvidin 3-O-glucosidepyruvate procyanidin dimer 2    | 28.9 |           |        |           | 1093.2603 | 1.015  | 641-803-943     |
| 64 | Kaempferol 3-O-glucuronide                            | 29.4 | 461.07202 | 0.043  | 285       | 463.08673 | 1.965  | 287             |
| 65 | Isorhamnetin 3-O-glucoside                            | 29.7 | 477.10336 | 0.125  | 299 - 315 |           |        |                 |
| 66 | Kaempferol 3-O-glucoside                              | 29.9 | 447.09286 | 0.290  | 285       | 449.10751 | 1.914  | 287             |

|    |                                                               |      |           |       |                       |           |       |                             |
|----|---------------------------------------------------------------|------|-----------|-------|-----------------------|-----------|-------|-----------------------------|
| 67 | Malvidin 3-O-glucoside-8-ethyl-(epi)catechin isomer 4         | 29.9 |           |       |                       | 809.22821 | 0.654 | 357-519-647                 |
| 68 | Quercetin 3-O-rhamnoside                                      | 30   |           |       |                       | 449.10773 | 1.425 | 287 - 303                   |
| 69 | Delphinidin 3-O-(6''-coumaroyl)-glucoside                     | 30.3 |           |       |                       | 611.13892 | 1.882 | 303                         |
| 70 | Dihydrokaempferol 3-O-rhamnoside                              | 30.8 |           |       |                       | 435.12869 | 0.965 | 289 - 322 - 399 - 417       |
| 71 | Myricetin                                                     | 31.2 |           |       |                       | 319.04498 | 1.253 | 153 - 165 - 245 - 273 - 301 |
| 72 | Syringetin 3-O-glucoside                                      | 33.1 | 507.11444 | 1.143 | 344                   | 509.12869 | 1.591 | 347                         |
| 73 | Malvidin 3-O-(6''-coumaroyl)-glucoside-pyruvate               | 34.2 |           |       |                       | 707.16022 | 1.385 | 399                         |
| 74 | Malvidin 3-O-(6''-caffeoyl)-glucoside                         | 34.8 |           |       |                       | 655.16528 | 1.526 | 331 - 493                   |
| 75 | Cyanidin 3-O-(6''-coumaroyl)-glucoside                        | 35.8 |           |       |                       | 595.1438  | 1.377 | 287                         |
| 76 | Petunidin 3-O-(6''-coumaroyl)-glucoside-8-ethyl-(epi)catechin | 36.5 |           |       |                       | 941.24957 | 0.318 | 343-651                     |
| 77 | Petunidin 3-O-(6''-coumaroyl)-glucoside                       | 36.6 |           |       |                       | 625.15448 | 1.983 | 317                         |
| 78 | Kaempferol 3-O-rhamnoside                                     | 38.9 |           |       |                       | 433.11270 | 1.755 | 287                         |
| 79 | Malvidin 3-O-(6''-coumaroyl)-glucoside acetaldehyde           | 39.9 |           |       |                       | 663.17023 | 1.719 | 355                         |
| 80 | Peonidin 3-O-(6''-coumaroyl)-glucoside                        | 42.3 |           |       |                       | 609.15967 | 1.855 | 301                         |
| 81 | Malvidin 3-O-glucoside-4-vinyl-(epi)catechin                  | 42.4 |           |       |                       | 805.19708 | 0.447 | 491-643                     |
| 82 | Malvidin 3-O-(6''-coumaroyl)-glucoside                        | 43.2 |           |       |                       | 639.17023 | 1.783 | 331                         |
| 83 | Malvidin 3-O-(6''-coumaroyl)-glucoside ethyl-catechin         | 44.7 |           |       |                       | 955.2652  | 0.889 | 357-665                     |
| 84 | Syringetin 3-O-(6''-acetyl)-glucoside                         | 45.2 | 549.12463 | 0.382 | 344                   | 551.1391  | 1.741 | 347                         |
| 85 | Quercetin                                                     | 47.8 | 301.03531 | 1.594 | 151 - 165 - 179 - 301 | 303.0499  | 1.880 | 137 - 153 - 229 - 247 - 285 |
| 86 | Laricitrin                                                    | 49.9 |           |       |                       | 333.06061 | 1.261 | -                           |
| 87 | Malvidin 3-O-(6''-coumaroyl)-glucoside-4-vinylphenol          | 53.3 |           |       |                       | 755.19666 | 0.516 | 447                         |
| 88 | Syringetin                                                    | 53.9 | 345.06131 | 0.782 | 315                   |           |       |                             |
| 89 | Kaempferol                                                    | 54.7 | 285.04007 | 0.561 | 173 - 229 - 241 - 285 | 287.05508 | 1.637 | 121 - 153 - 213 - 241       |
| 90 | Isorhamnetin                                                  | 55.6 | 315.05069 | 0.666 | 151 - 315             | 317.06558 | 1.703 | 285-302                     |

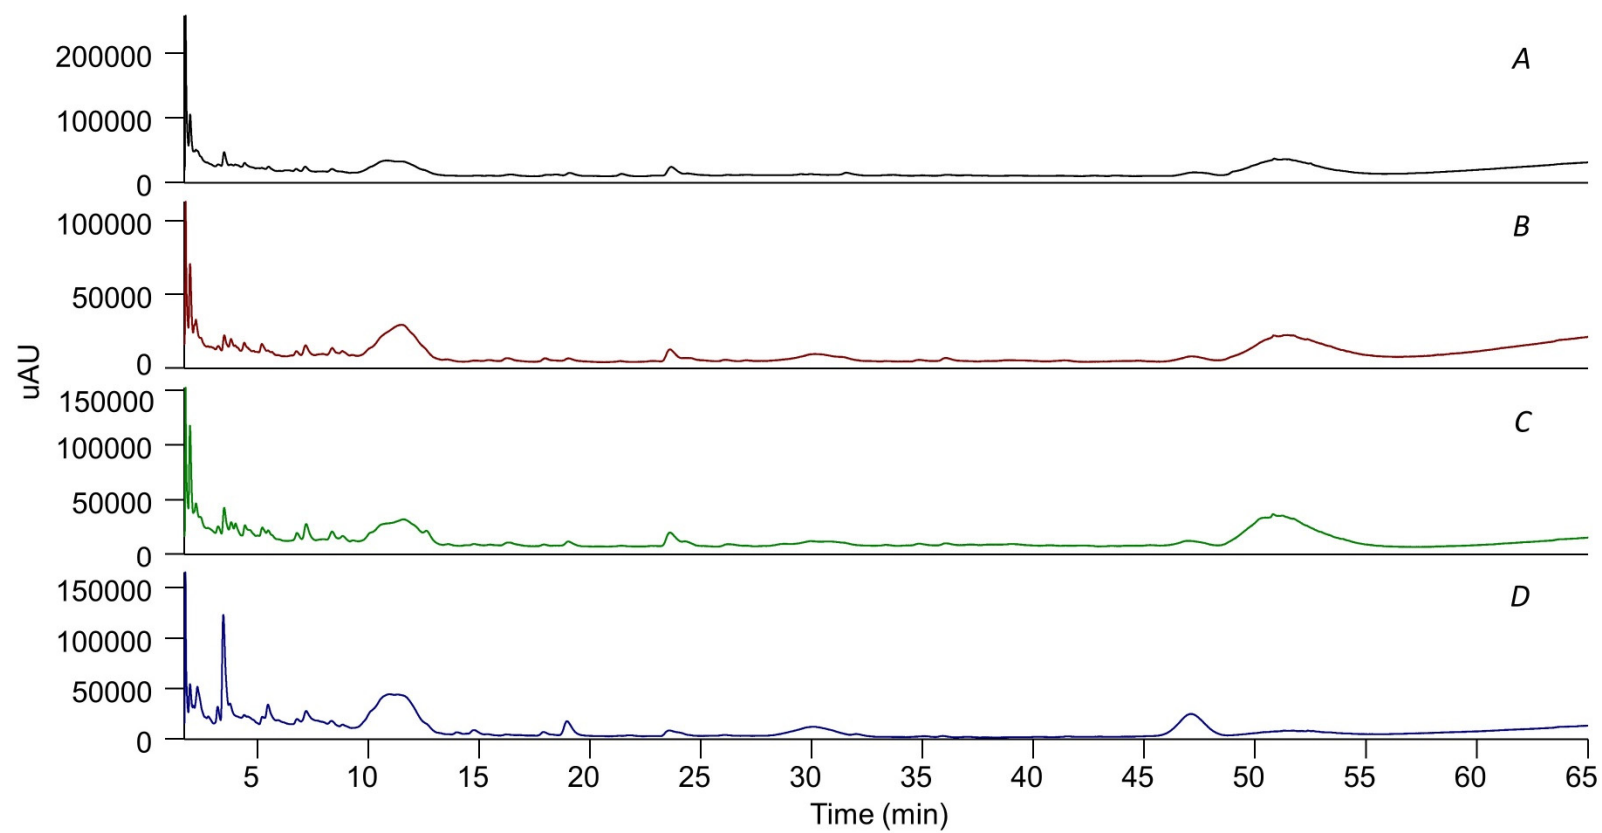

**Figure S1.** LC-UV profile of the four enocianina acquired in the range 200-600 nm.

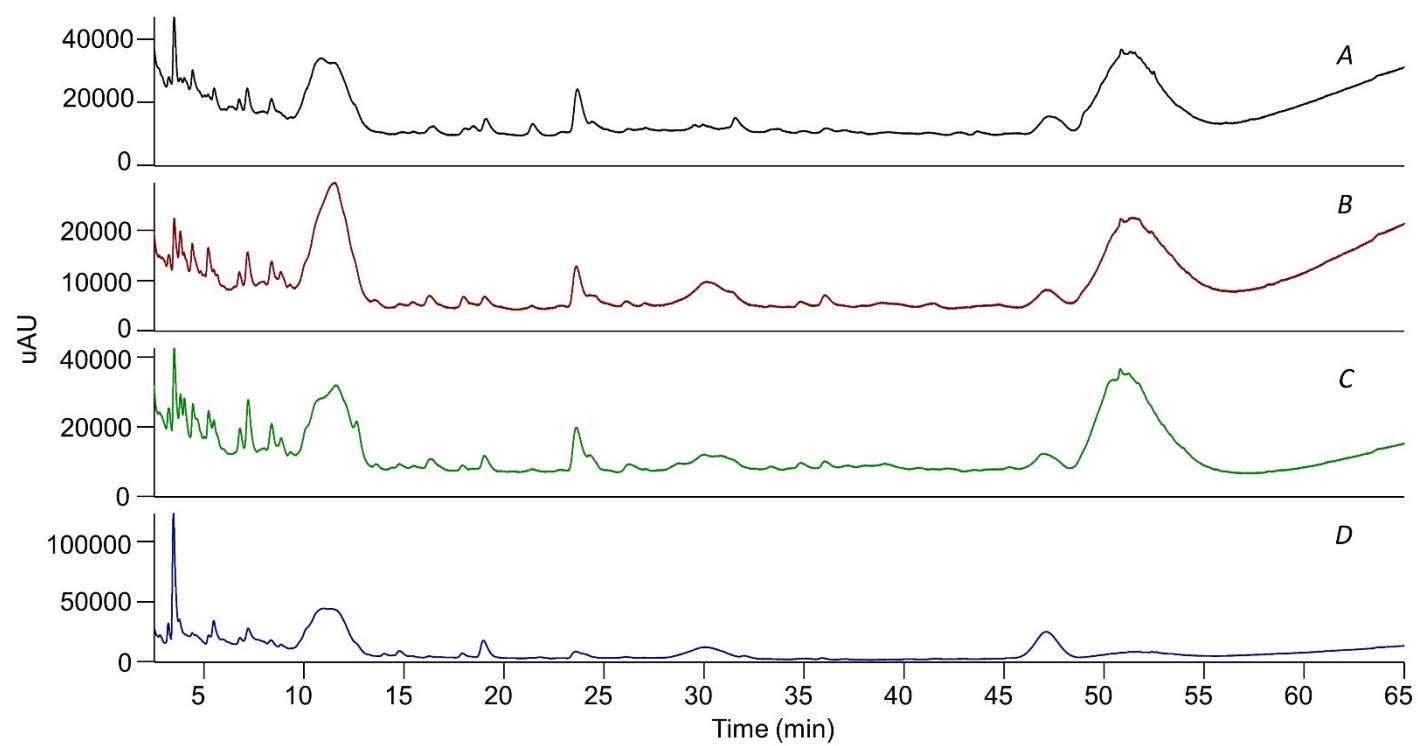

**Figure S2.** Magnification of Figure S2.
